# Supplementary material for: Gut microbiome insights from 16S rRNA analysis of 17-year periodical cicadas (Hemiptera: Magicicada spp.) Broods II, VI, and X
Source: PubMed Central journal article supplement (PMC9550851; doi:10.1038/s41598-022-20527-7), 2022-10-10
Supplement: 41598_2022_20527_MOESM2_ESM.pdf [file 41598_2022_20527_MOESM2_ESM.pdf]

**Gut microbiome insights from 16S rRNA analysis of 17-year periodical cicadas  
(*Hemiptera: Magicicada spp.*) Broods II, VI, and X**

Kyle D. Brumfield<sup>1,2</sup>, Michael J. Raupp<sup>3</sup>, Diler Haji<sup>4</sup>, Chris Simon<sup>4</sup>, Joerg Graf<sup>5</sup>, John R. Cooley<sup>6</sup>,  
Susan T. Janton<sup>5</sup>, Russell C. Meister<sup>4</sup>, Anwar Huq<sup>1</sup>, Rita R. Colwell<sup>1,2,\*</sup>, Nur A. Hasan<sup>7,\*</sup>

<sup>1</sup> Maryland Pathogen Research Institute, University of Maryland, College Park, MD, 20742, USA

<sup>2</sup> University of Maryland Institute for Advanced Computer Studies, University of Maryland, 20742,  
College Park, MD, USA

<sup>3</sup> Department of Entomology, University of Maryland, College Park, MD, 20742, USA

<sup>4</sup> Department of Ecology and Evolutionary Biology, University of Connecticut, Storrs, CT, 06269,  
USA

<sup>5</sup> Department of Molecular and Cell Biology, University of Connecticut, Storrs, CT, 06269, USA

<sup>6</sup> Department of Ecology and Evolutionary Biology, University of Connecticut, Hartford, CT, 06103,  
USA

<sup>7</sup> EZbiome Inc., Gaithersburg, MD, 20878, USA

\*Correspondence: RRC, [rcolwell@umd.edu](mailto:rcolwell@umd.edu); NAH, [hasan@ezbiome.com](mailto:hasan@ezbiome.com)

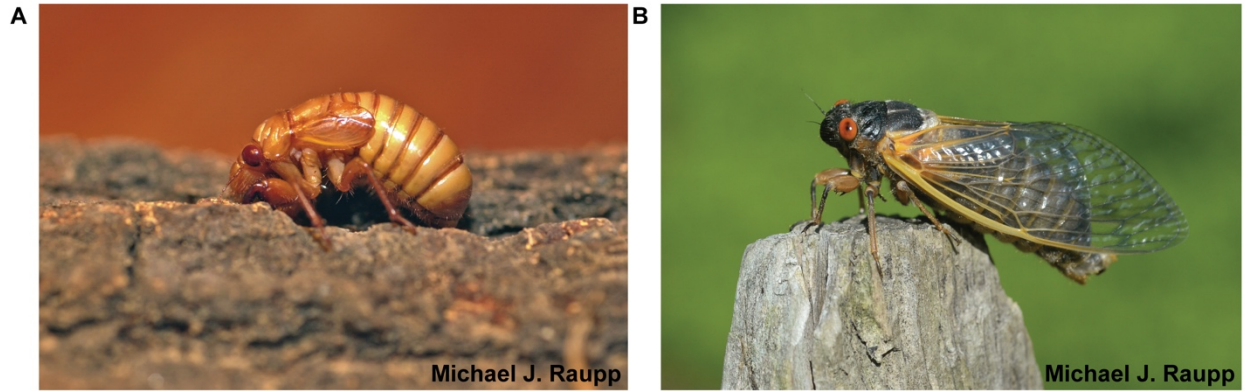

Figure S1: Photographs of A) nymph and B) adult 17-year periodical cicadas (*Magicicada* spp. Brood X).

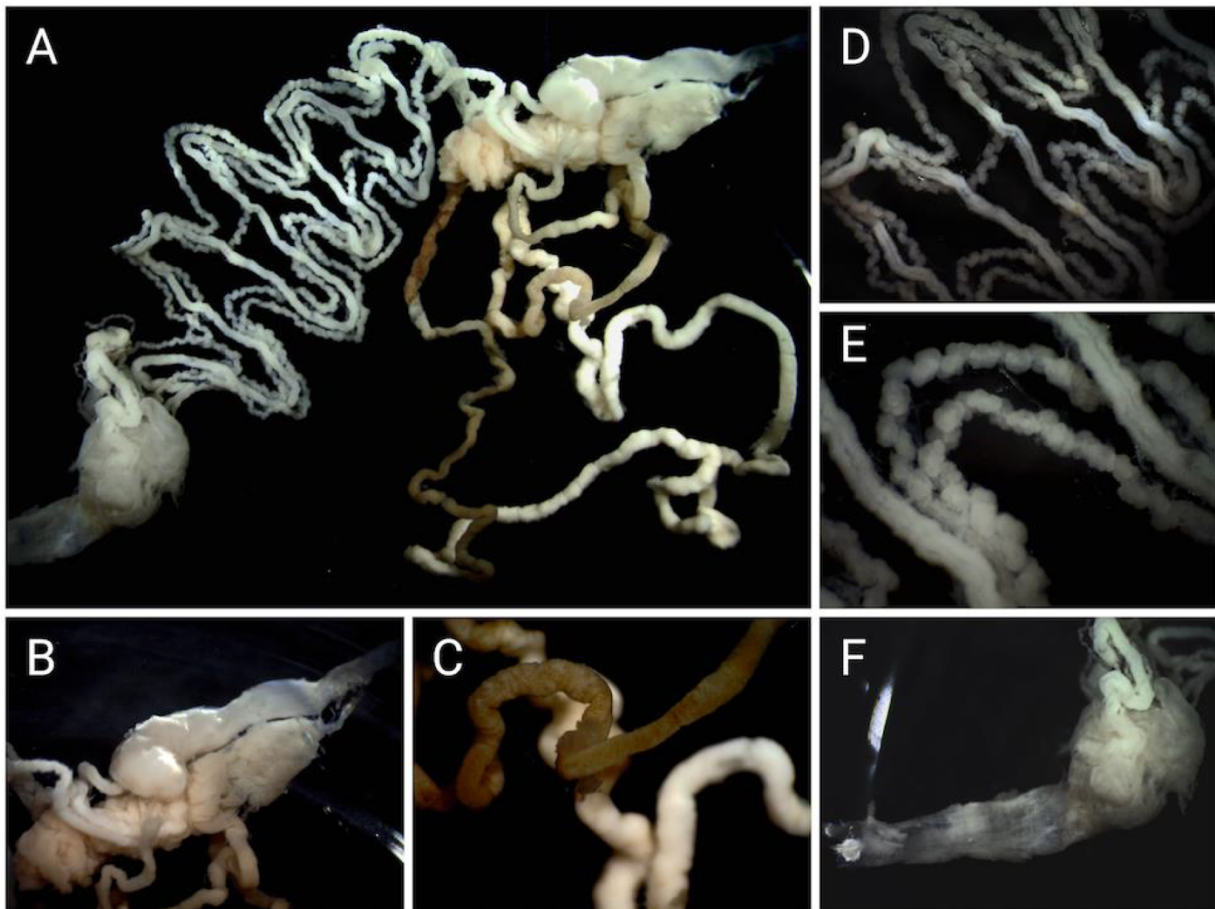

Figure S2: Image of gut tissue dissected from nymphal *Magicicada septendecium*. Shown are A) Complete gut, B) Filter chamber, C) Midgut, D-E) Malpighian tubules and hindgut, and F) Rectum. Adult gut anatomy and other *Magicicada* spp., appears identical to that of the *M. septendecium* nymph.

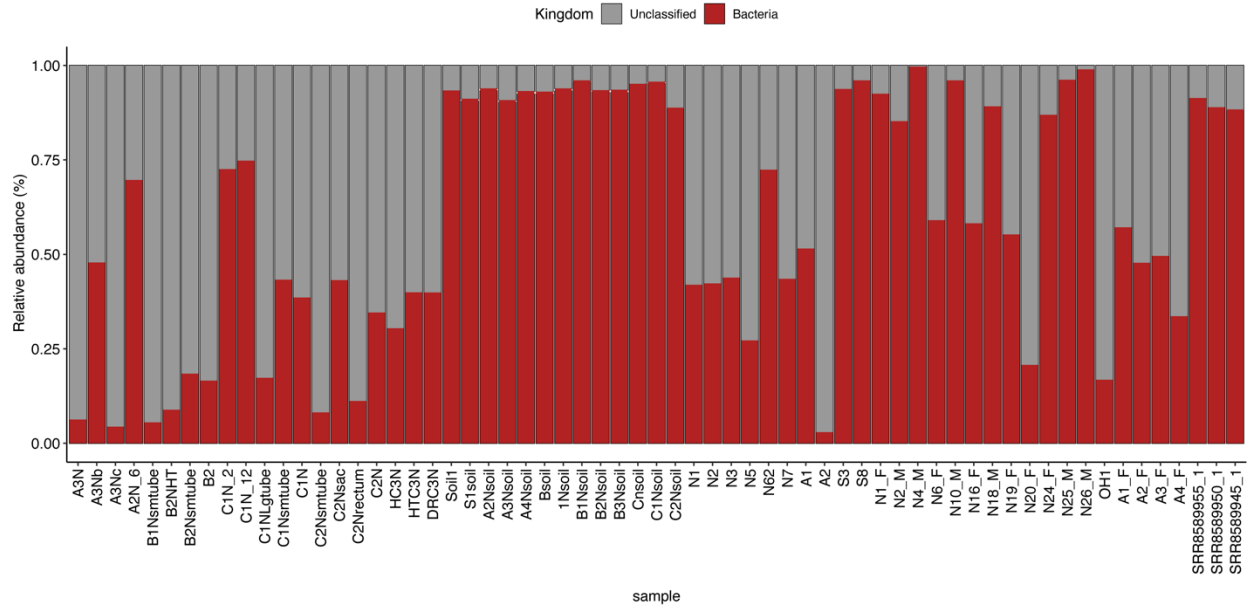

**Figure S3: Stacked bar plot showing relative abundance of reads classified as bacteria relative to the total number of reads generated in each sample.**

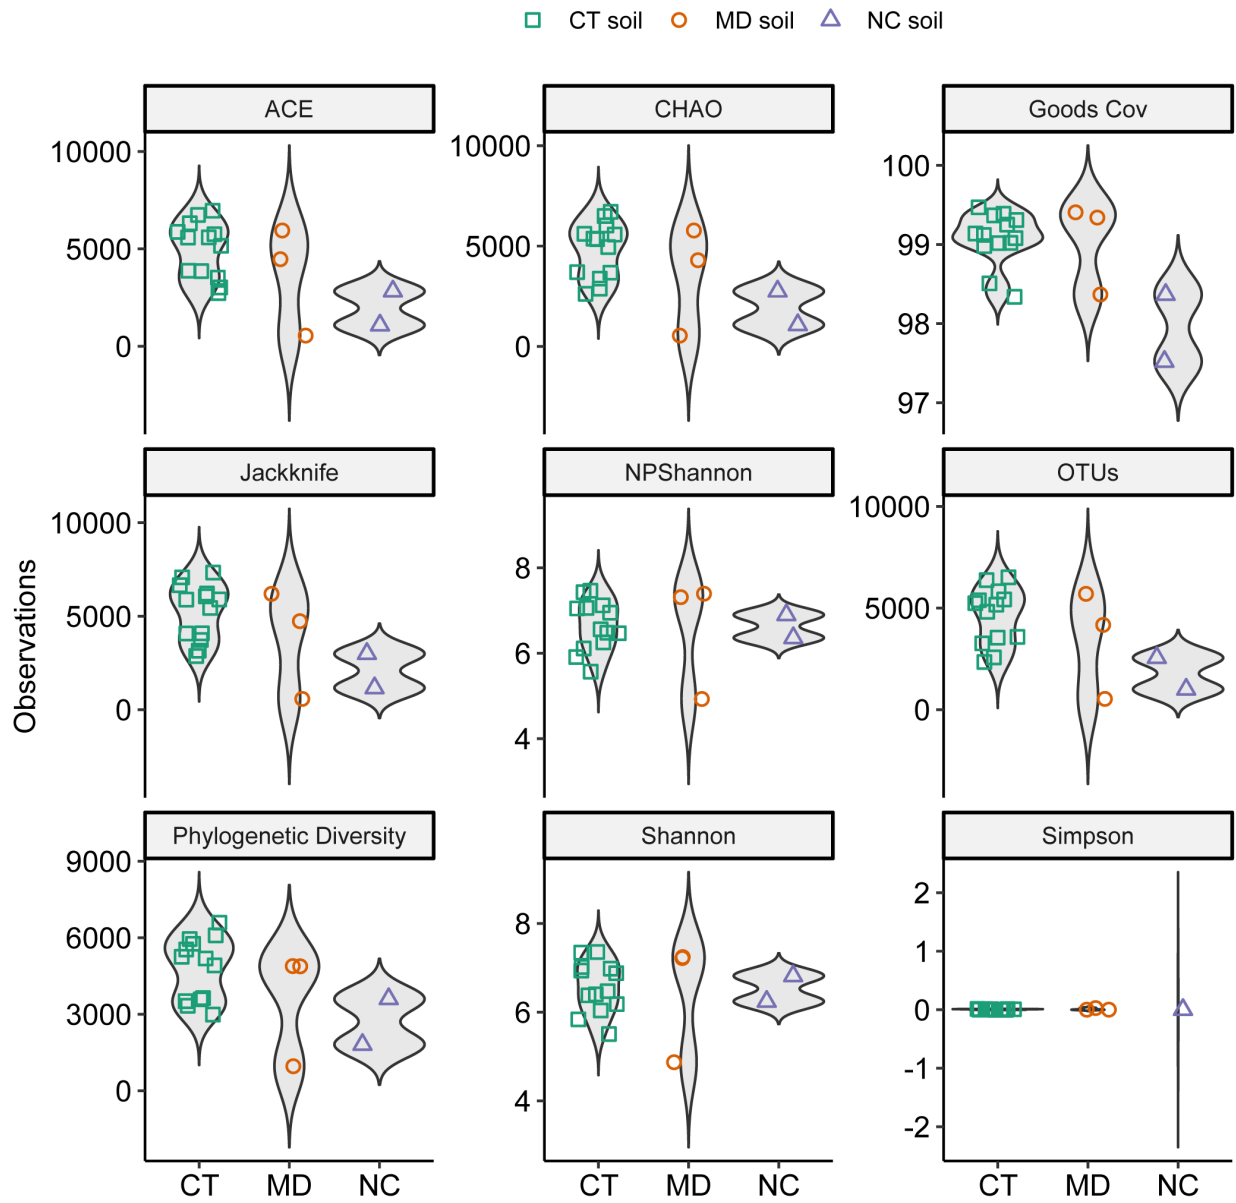

**Figure S4: Violin plots showing alpha diversity comparison between MTP sets of soil samples.**

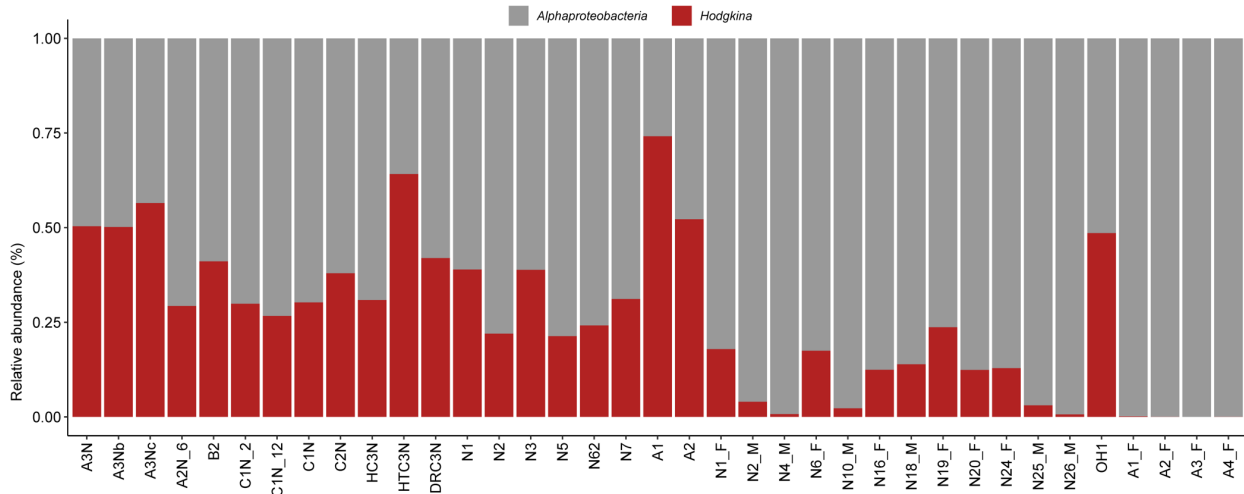

**Figure S5: Stacked bar plot showing relative abundance of reads classified as *Hodgkinia* relative to the total number of reads profiled as *Alphaproteobacteria* in each sample.**

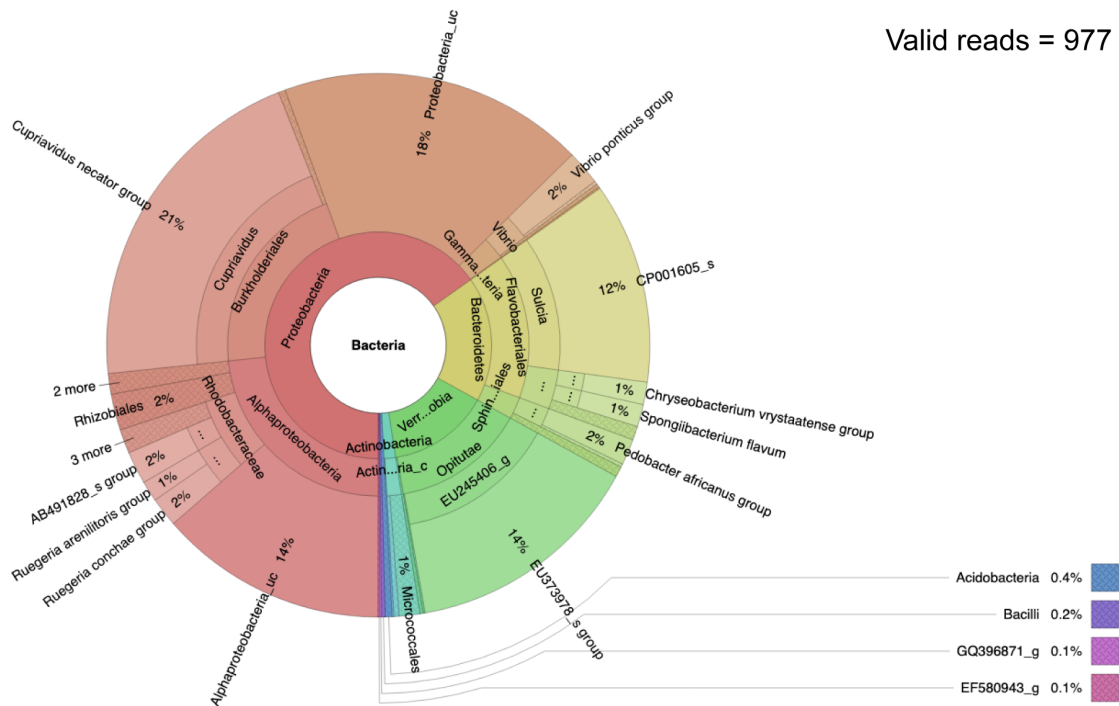

**Figure S6: Krona plot showing relative abundance of bacteria profiled in the wash fluid of the OH Brood X nymph.**

## Phylum

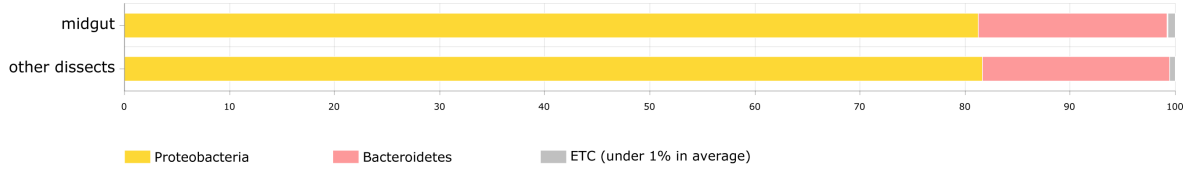

## Order

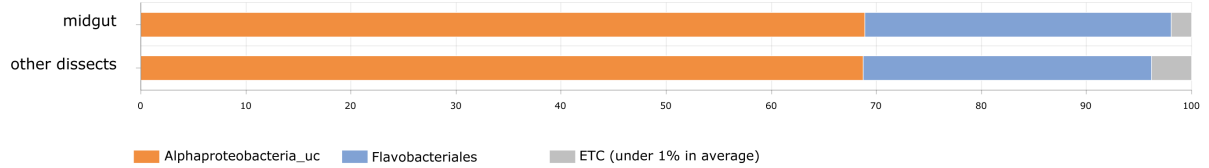

## PERMANOVA results

| All sets       |                     | Pair-wise      |          |         |         |
|----------------|---------------------|----------------|----------|---------|---------|
| p-value        | Sets                |                | pseudo-F | p-value | q-value |
| N.S. (p=0.774) | 2                   | midgut         | 0.067    | 0.774   | 0.774   |
| MTPs           | No. of permutations | other dissecta |          |         |         |
| 8              | 999                 |                |          |         |         |

## Inter-set distances

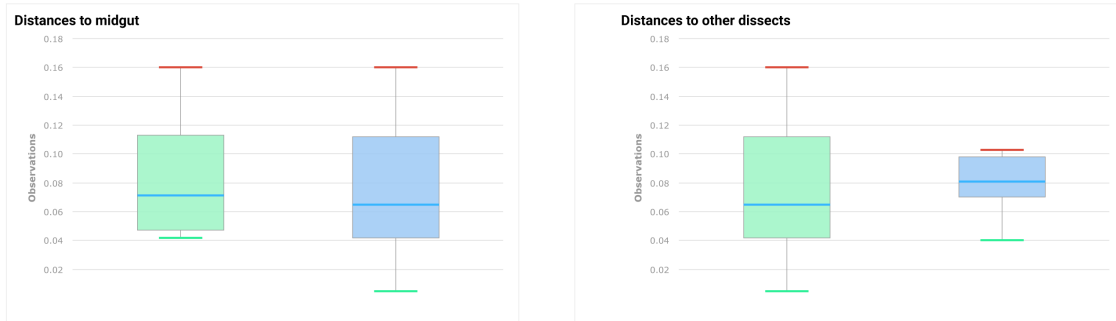

## LEfSe analysis

| Taxon name                | Taxon rank | Taxonomy                                                                              | LDA effect size | p-value | p-value (FDR) | Max group      | midgut  | other dissecta |
|---------------------------|------------|---------------------------------------------------------------------------------------|-----------------|---------|---------------|----------------|---------|----------------|
| Tenericutes               | Phylum     | Bacteria                                                                              | 2.20018         | 0.04722 | 0.42845       | hindgut        | 0.02907 | 0.00000        |
| Ralstonia pickettii group | Species    | Bacteria: Proteobacteria: Betaproteobacteria: Burkholderiales: Ralstonia_f. Ralstonia | 2.19196         | 0.04722 | 0.42845       | other dissecta | 0.00000 | 0.03489        |

**Figure S7: Comparison of bacterial populations residing in different gut organs of CT Brood II nymphs.**
